# Supplementary material for: Ensemble of Gene Signatures Identifies Novel Biomarkers in Colorectal Cancer Activated through PPARγ and TNFα Signaling
Source: PubMed Central journal article supplement (PMC3795784; doi:10.1371/journal.pone.0072638), 2013-08-19
Supplement: pone.0072638.s007.pdf [file pone.0072638.s007.pdf]

**Table ST1. gene ranking reports the most common genes selected by the algorithm in the various signatures.** The second column reports the number of signature containing the corresponding gene and third column is its average importance index.

| <b>Gene</b>  | <b>Counts</b> | <b>Average importance</b> |
|--------------|---------------|---------------------------|
| AKAP12       | 8             | 85.93                     |
| DCBLD2       | 3             | 79.31                     |
| NT5E         | 2             | 51.87                     |
| NPR3         | 2             | 54.74                     |
| AGPAT5       | 2             | 25.67                     |
| ADIPOQ       | 2             | 30.59                     |
| 244026_at    | 1             | 54.46                     |
| SLFN5        | 1             | 27.81                     |
| 243820_at    | 1             | 31.04                     |
| NGEF         | 1             | 69.11                     |
| LONRF3       | 1             | 92.05                     |
| 241867_at    | 1             | 56.53                     |
| ULBP2        | 1             | 59.97                     |
| EFHA2        | 1             | 39.07                     |
| 238109_at    | 1             | 35.5                      |
| FOXA1        | 1             | 17.26                     |
| 236795_at    | 1             | 46.72                     |
| ISM1         | 1             | 71.58                     |
| METTL4       | 1             | 18.09                     |
| 231989_s_at  | 1             | 12.7                      |
| KIAA1462     | 1             | 29.18                     |
| 230711_at    | 1             | 35.93                     |
| DCBLD2       | 1             | 66.28                     |
| ADAMTS5      | 1             | 30.84                     |
| EMID2        | 1             | 10.99                     |
| LOC100132891 | 1             | 20.25                     |
| AKAP12       | 1             | 87.62                     |
| FST          | 1             | 99.37                     |
| FAM217B      | 1             | 33.84                     |
| SLC44A2      | 1             | 12.59                     |
| ARHGAP9      | 1             | 23.95                     |
| ATL3         | 1             | 35.78                     |
| AP2A1        | 1             | 95.31                     |
| ETV1         | 1             | 96.72                     |
| EHD2         | 1             | 11.03                     |
| NOL3         | 1             | 99.99                     |
| C17orf48     | 1             | 13.27                     |

|              |   |       |
|--------------|---|-------|
| SNX16        | 1 | 35.38 |
| PITPNC1      | 1 | 15.75 |
| FERMT1       | 1 | 47.58 |
| U2AF2        | 1 | 15.23 |
| EI24         | 1 | 39.88 |
| POSTN        | 1 | 40.43 |
| CLDN8        | 1 | 19.16 |
| DNAJC4       | 1 | 13.54 |
| DUSP7        | 1 | 54.46 |
| GUSBP11      | 1 | 29.28 |
| KIAA1462     | 1 | 39.18 |
| CDR2L        | 1 | 31.2  |
| APLP2        | 1 | 24.59 |
| CTGF         | 1 | 32.83 |
| RAB2A        | 1 | 69.69 |
| ABI2         | 1 | 30.36 |
| ST18         | 1 | 63.36 |
| PCSK5        | 1 | 36.88 |
| DZIP1        | 1 | 57.28 |
| C11orf9      | 1 | 50.99 |
| ADCY7        | 1 | 30.69 |
| CDK1         | 1 | 21.17 |
| GMFB         | 1 | 56.85 |
| PAPPA        | 1 | 84.23 |
| 1569202_x_at | 1 | 42.03 |
| SRGAP2P1     | 1 | 34.41 |
| 1563467_at   | 1 | 19.51 |
| SLC25A43     | 1 | 23.38 |
| 1556983_a_at | 1 | 48.01 |
| UGGT2        | 1 | 45.31 |
| CD96         | 1 | 81.97 |
| CPO          | 1 | 12.64 |
| KCNH8        | 1 | 44.47 |
| MGC16703     | 1 | 86.56 |
| ACACB        | 1 | 19.74 |
| C6orf141     | 1 | 11.22 |
