# Supplementary material for: Ensemble of Gene Signatures Identifies Novel Biomarkers in Colorectal Cancer Activated through PPARγ and TNFα Signaling
Source: PubMed Central journal article supplement (PMC3795784; doi:10.1371/journal.pone.0072638), 2013-08-19
Supplement: pone.0072638.s008.pdf [file pone.0072638.s008.pdf]

**Table ST2. Correlation of selected biomarker and clinico-pathological parameters** The classification of the tumors was based on the TNM (Tumor-Node-Metastasis) system according to the criteria of the International Union Against Cancer. In red are indicated statistically significant levels.

| Parameters                | AKAP12      |            | P     | DCBLD2     |            | P               | NT5E       |             | P               | SPON1      |            | P     |
|---------------------------|-------------|------------|-------|------------|------------|-----------------|------------|-------------|-----------------|------------|------------|-------|
|                           | Low %       | High %     |       | Low %      | High %     |                 | Low %      | High %      |                 | Low %      | High %     |       |
| <b>Sex</b>                |             |            | 0.342 |            |            | 0.397           |            |             | 0.474           |            |            | 0.164 |
| Male                      | 56 (59.6%)  | 26 (68.4%) |       | 45 (67.1%) | 44 (60.2%) |                 | 40 (66.6%) | 48 (60.75%) |                 | 21 (55.2%) | 62 (68.1%) |       |
| Female                    | 38 (40.4%)  | 12 (31.6%) |       | 22 (32.9%) | 29 (39.8%) |                 | 20 (33.4%) | 31 (39.25%) |                 | 17 (44.8%) | 29 (31.9%) |       |
| <b>Age</b>                |             |            | 0.376 |            |            | 0.265           |            |             | 0.222           |            |            | 0.197 |
| ≤60                       | 16 (17%)    | 9 (23.6%)  |       | 15 (41.4%) | 11 (15%)   |                 | 14 (23.3%) | 12 (15.2%)  |                 | 10 (26.3%) | 15 (16.5%) |       |
| >60                       | 78 (83%)    | 29 (86.4%) |       | 52 (58.6%) | 62 (85%)   |                 | 46 (76.7%) | 67 (84.8%)  |                 | 28 (73.7%) | 76 (83.5%) |       |
| <b>Tumor Stage</b>        |             |            | 0.599 |            |            | <b>0.021</b>    |            |             | <b>0.005</b>    |            |            | 0.73  |
| I                         | 8 (8.5%)    | 6 (15.7%)  |       | 7 (10.4%)  | 8 ( 11%)   |                 | 4 (6.6%)   | 11 (14%)    |                 | 5 (13.1%)  | 9 (3.4%)   |       |
| II                        | 43 (45.7%)  | 18 (52.9%) |       | 26 (38.8%) | 42 (57.5%) |                 | 37 (61.6%) | 31 (39.2%)  |                 | 20 (52.6%) | 42 (55.9%) |       |
| III                       | 15 (15.9%)  | 5 (14.7%)  |       | 9 (13.4%)  | 12 (16.5%) |                 | 11 (18.4%) | 9 (11.4%)   |                 | 4 (10.5%)  | 15 (17%)   |       |
| IV                        | 28 (29.9%)  | 9 (26.7%)  |       | 25 (37.4%) | 11 (15%)   |                 | 8 (13.4%)  | 28 (35.4%)  |                 | 9 (23.8%)  | 25 (23.7%) |       |
| <b>Grade</b>              |             |            | 0.262 |            |            | 0.682           |            |             | <b>0.052</b>    |            |            | 0.726 |
| G1                        | 17 (18%)    | 10 (27%)   |       | 12 (17.9%) | 15 (20.8%) |                 | 15 (25%)   | 12 (15.4%)  |                 | 9 (24.3%)  | 18 (19.8%) |       |
| G2                        | 64 (68%)    | 25 (67.6%) |       | 49 (73.1%) | 48 (66.6%) |                 | 42 (70%)   | 54 (69.2%)  |                 | 25 (67.6%) | 62 (68.2%) |       |
| G3                        | 13 (14%)    | 2 (5.4%)   |       | 6 (9%)     | 9 (12.6%)  |                 | 3 ( 5%)    | 12 (15.4%)  |                 | 3 (8.1%)   | 11 (12%)   |       |
| <b>T Stage*</b>           |             |            | 0.267 |            |            | 0.477           |            |             | <b>0.012</b>    |            |            | 0.856 |
| T1                        | 5 (5.5%)    | 3 (8.6%)   |       | 2 (3.2%)   | 7 (10%)    |                 | 5 ( 8.5%)  | 4 (5.5%)    |                 | 2 (5%)     | 5 (5.7%)   |       |
| T2                        | 8 (8.8%)    | 6 (17.1%)  |       | 7 (11.1%)  | 8 (11.4%)  |                 | 2 ( 3.4%)  | 13 (17.8%)  |                 | 5 (14.2%)  | 9 (10.3%)  |       |
| T3                        | 72 (80.2%)  | 26 (74.3%) |       | 52 (82.5%) | 53 (75.7%) |                 | 52 (88.1%) | 52 (71.2%)  |                 | 26 (75.8%) | 70 (80.4%) |       |
| T4                        | 5 (5.5%)    | 0          |       | 2 (3.2%)   | 2 (2.9%)   |                 | 0          | 4 (5.5%)    |                 | 2 (5%)     | 3 (3.6%)   |       |
| <b>N Stage</b>            |             |            | 0.466 |            |            | 0.095           |            |             | 0.488           |            |            | 0.513 |
| N0                        | 62 (65.95%) | 27 (71.2%) |       | 41 (61.2%) | 43 (78.2%) |                 | 44 (73.8%) | 52 (65.8%)  |                 | 28 (73.7%) | 60 (65.9%) |       |
| N1                        | 14 (14.90%) | 7 (18.4%)  |       | 11 (16.4%) | 7 (12.7%)  |                 | 9 (14.2%)  | 12 (15.1%)  |                 | 6 (15.8%)  | 14 (15.4%) |       |
| N2                        | 18 (19.15%) | 4 (10.4%)  |       | 15 (22.4%) | 5 (9.1%)   |                 | 7 (12%)    | 15 (19.1%)  |                 | 4 (10.5%)  | 17 (18.7%) |       |
| <b>Distant metastasis</b> |             |            | 0.453 |            |            | <b>5.71E-05</b> |            |             | <b>6.62E-04</b> |            |            | 0.612 |
| M0                        | 63 (67%)    | 28 (73.6%) |       | 36 (53.7%) | 62 (84.9%) |                 | 51 (85%)   | 46 (58.2%)  |                 | 28 (73.7%) | 63 (69.2%) |       |
| M1                        | 31 (33%)    | 10 (26.4%) |       | 31 (46.3%) | 11 (15.1%) |                 | 9 (15%)    | 33 (41.8%)  |                 | 10 (26.3%) | 28 (30.8%) |       |
